# Supplementary material for: CRISPRi-Library-Guided Target Identification for Engineering Carotenoid Production by Corynebacterium glutamicum
Source: PubMed Central journal article supplement (PMC8064071; doi:10.3390/microorganisms9040670), 2021-03-24
Supplement: microorganisms-09-00670-s001.pdf [file microorganisms-09-00670-s001.pdf]

# Supplementary Materials to

## CRISPRi-library guided target identification for engineering carotenoid production by *Corynebacterium glutamicum*

Vanessa L. Göttl, Ina Schmitt, Kristina Braun, Petra Peters-Wendisch, Volker F. Wendisch \* and Nadja A. Henke

Genetics of Prokaryotes, Faculty of Biology & CeBiTec, Bielefeld University, Germany  
 \* Correspondence: Volker.wendisch@uni-bielefeld.de; Tel.: +49-521-106-5611

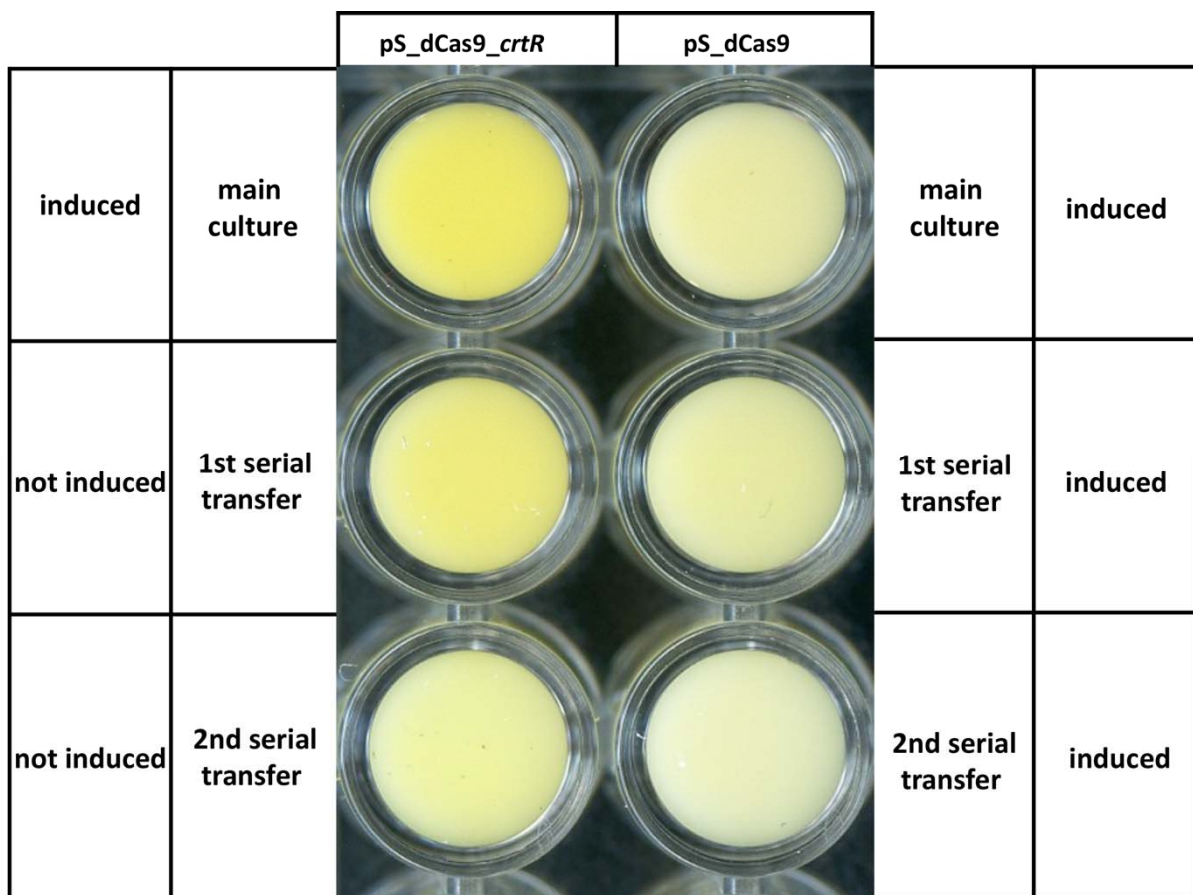

**Figure S1.** Duration of the inhibitory effect of the CRISPRi targeting *crtrR*. For visual comparison of the decaprenoxanthin pigmentation for the duration of the inhibitory effect, the *C. glutamicum* CRISPRi empty vector (pS\_dCas9) strain and the strain *C. glutamicum* (pS\_dCas9\_crtrR) were induced with 1 mM IPTG and 0.25  $\mu\text{g mL}^{-1}$  aTc and cells were grown in 40 g L<sup>-1</sup> glucose CGXII minimal medium (main culture induced). Cells were transferred two times into fresh CGXII minimal medium with 40 g L<sup>-1</sup> glucose (1st and 2nd serial transfer). The empty vector strain was induced under all conditions. The strain *C. glutamicum* (pS\_dCas9\_crtrR) was transferred to medium without induction to test the duration of the inhibitory effect. For visual presentation cells were transferred to a 96-well microtiter plate adjusted to an OD<sub>600</sub> of 150 for comparison. Visible reduction of the decaprenoxanthin level can be observed after two serial transfers of *C. glutamicum* (pS\_dCas9\_crtrR) in media without induction of the CRISPRi system.

**Table S1.** Oligonucleotides used in this study.

| Oligonucleotide | Sequence (5'→ 3')                                                              | Used for                                                |
|-----------------|--------------------------------------------------------------------------------|---------------------------------------------------------|
| vgag            | TACGCCAAGCTTGCATGCCTGCAGTTTTAGA<br>GCTAGAAATAGCAAGTTAAAATAAGGCTAGT<br>CCGTTATC | amplification dCas9 handle and<br>terminator from piCas |
| vgam            | TACCCGGGGATCCTCTAGAGTCGACGAAAAA<br>AGCACCGACTCGGTGCC                           | amplification dCas9 handle and<br>terminator from piCas |
| vgai            | GTATGGCTGTGCAGGTCGTAAA                                                         | forward sequencing primer for<br>pS_dCas9               |
| vgaj            | CCGCTTCTGCGTTCTGATTTAATCT                                                      | reverse sequencing primer for<br>pS_dCas9               |
| vgaw            | AGCTCACCTTAAGCTTTCCCC                                                          | qRT-PCR <i>crtR</i>                                     |
| vgax            | CGGATAACCACTTCACGCTC                                                           | qRT-PCR <i>crtR</i>                                     |
| vgjg            | TGAGATAGCCGAGGCCATAAC                                                          | qRT-PCR <i>crtEb</i>                                    |
| vgjh            | CGCCCCATTAGCTGGATCAATAC                                                        | qRT-PCR <i>crtEb</i>                                    |
| vgjc            | CCTTGAGCAGTTTCGATGCC                                                           | qRT-PCR <i>idsA</i>                                     |
| vgjd            | ACCAGCCCACGCATAAAGAG                                                           | qRT-PCR <i>idsA</i>                                     |
| vgdr            | AACCATCCGTATCCCAGTCC                                                           | qRT-PCR <i>sigA</i>                                     |
| Vgdq            | AGTCTTCGATGAAGTCGCC                                                            | qRT-PCR <i>sigA</i>                                     |
| del-sdhCAB-1    | GCTCTAGAGCCACCAGGTGCCCGGGCGT                                                   | amplification of flanking region<br>of <i>sdhCAB</i>    |
| del-sdhCAB-2    | CCCATCCACTAACTTAAACATCTAACAG<br>TCATGGCACCCCTCC                                | amplification of flanking region<br>of <i>sdhCAB</i>    |
| del-sdhCAB-3    | TGTTTAAGTTTAGTGGATGGGTTCCGAGG<br>CAAAGACGACTAG                                 | amplification of flanking region<br>of <i>sdhCAB</i>    |
| del-sdhCAB-4    | GCTCTAGAACTACTGCGTACGGCCGGTT                                                   | amplification of flanking region<br>of <i>sdhCAB</i>    |
| del-sdhCAB-5    | TCCTATAAGTGGGGTTTTATGTCTCTAACAG                                                | verification of the <i>sdhCAB</i><br>deletion           |
| del-sdhCAB-6    | CGCTCGAGGGATGAGTGTGGAGAG                                                       | verification of the <i>sdhCAB</i><br>deletion           |

**Table S2:** Annealing oligo primers for construction complementary regions of sgRNA templates. The 20 bp target specific regions are given in capital letters.

| target       | annealing oligo primer sequence (5' → 3')                                                       |
|--------------|-------------------------------------------------------------------------------------------------|
| <i>aceA</i>  | fw: gccaaagcttgcatgcctgcaGCGACGAACGACGCTTGGAA<br>rv: gctatttctagctctaaaaacTTCCAAGCGTCGTTTCGTCGC |
| <i>aceB</i>  | fw: gccaaagcttgcatgcctgcaGAACCAGTTAGAGTAACCTA<br>rv: gctatttctagctctaaaaacTAGGTTACTCTAACTGGTTC  |
| <i>aceE</i>  | fw: gccaaagcttgcatgcctgcaTCTTCACCTGGGTGGTAGTA<br>rv: gctatttctagctctaaaaacTACTACCACCCAGGTGAAGA  |
| <i>ackA</i>  | fw: gccaaagcttgcatgcctgcaGTGTCAAAGACAGCTACGTG<br>rv: gctatttctagctctaaaaacCACGTAGCTGTCTTTGACAC  |
| <i>acn</i>   | fw: gccaaagcttgcatgcctgcaAAGGGTGCTCTTAGCATTGA<br>rv: gctatttctagctctaaaaacTCAATGCTAAGAGCACCCCTT |
| <i>crtB</i>  | fw: gccaaagcttgcatgcctgcaTGGTTTTGGGGAAATAAAAT<br>rv: gctatttctagctctaaaaacATTTTATTTCCCCAAAACCA  |
| <i>crtE</i>  | fw: gccaaagcttgcatgcctgcaTAACATCGTCATGAACCAAA<br>rv: gctatttctagctctaaaaacTTTGGTTCATGACGATGTTA  |
| <i>crtEb</i> | fw: gccaaagcttgcatgcctgcaCAATCTCTCCTGCATTTAAT<br>rv: gctatttctagctctaaaaacATTAAATGCAGGAGAGATTG  |
| <i>crtI</i>  | fw: gccaaagcttgcatgcctgcaACGTGGAGAAATTATTATAA<br>rv: gctatttctagctctaaaaacTTATAATAATTTCTCCACGT  |
| <i>crtX</i>  | fw: gccaaagcttgcatgcctgcaGGCCAGGCGTCTCCTCTGTA<br>rv: gctatttctagctctaaaaacTACAGAGGAGACGCCTGGCC  |
| <i>crtYe</i> | fw: gccaaagcttgcatgcctgcaAAAGAATTGCTCGTAACGGA<br>rv: gctatttctagctctaaaaacTCCGTTACGAGCAATTCITT  |
| <i>deoC</i>  | fw: gccaaagcttgcatgcctgcaAACATCTACTTCGGAAGCTC<br>rv: gctatttctagctctaaaaacGAGCTTCCGAAGTAGATGTT  |
| <i>dxr</i>   | fw: gccaaagcttgcatgcctgcaGAGGCCTTTATTAATAAGGG<br>rv: gctatttctagctctaaaaacCCCTTATTAATAAAGGCCT   |
| <i>dxs</i>   | fw: gccaaagcttgcatgcctgcaGGATCTTATGCACATAGGAC<br>rv: gctatttctagctctaaaaacGTCCTATGTGCATAAGATCC  |
| <i>eno</i>   | fw: gccaaagcttgcatgcctgcaGTTGCGGAGAGCCTCAGAGA<br>rv: gctatttctagctctaaaaacTCTCTGAGGCTCTCCGCAAC  |
| <i>fbA</i>   | fw: gccaaagcttgcatgcctgcaGAGGAGGTGCAGTTGATGGC<br>rv: gctatttctagctctaaaaacGCCATCAACTGCACCTCCTC  |
| <i>fbp</i>   | fw: gccaaagcttgcatgcctgcaCCAGCTCCATAGCAAGGTTA<br>rv: gctatttctagctctaaaaacTAACCTTGCTATGGAGCTGG  |
| <i>fixB</i>  | fw: gccaaagcttgcatgcctgcaCGGTACTCAGCTAACACGCC<br>rv: gctatttctagctctaaaaacGGCGTGTTAGCTGAGTACCG  |
| <i>fum</i>   | fw: gccaaagcttgcatgcctgcaTCCAGACCACGACCAGAGAT<br>rv: gctatttctagctctaaaaacATCTCTGGTCGTGGTCTGGA  |
| <i>gapA</i>  | fw: gccaaagcttgcatgcctgcaGTCGCCAGTGTATGCGTGAA<br>rv: gctatttctagctctaaaaacTTCACGCATACACTGGCGAC  |
| <i>gltA</i>  | fw: gccaaagcttgcatgcctgcaAGCCAGTGCTCACATAACCT<br>rv: gctatttctagctctaaaaacAGGTTATGTGAGCACTGGCT  |

| target      | annealing oligo primer sequence (5' → 3')                                                     |
|-------------|-----------------------------------------------------------------------------------------------|
| <i>glxR</i> | fw: gccaaagcttgcacgctgcaTGAGGTTATTGACTGCCGTT<br>rv: gctatttctagctctaaaacAACGGCAGTCAATAACCTCA  |
| <i>gnd</i>  | fw: gccaaagcttgcacgctgcaGATTCCTTCTCGCGACGAA<br>rv: gctatttctagctctaaaacTTCGTGCGGAGAAGGAAATC   |
| <i>icd</i>  | fw: gccaaagcttgcacgctgcaCTTGCGGCAGTCTTCGATAA<br>rv: gctatttctagctctaaaacTTATCGAAGACTGCCGCAAG  |
| <i>idsA</i> | fw: gccaaagcttgcacgctgcaCAGCCCACGCATAAAGAGGA<br>rv: gctatttctagctctaaaacTCCTCTTTATGCGTGGGCTG  |
| <i>lIdD</i> | fw: gccaaagcttgcacgctgcaTGC GCGTGTGATTGAGAGTT<br>rv: gctatttctagctctaaaacAACTCTCAATCACACGCGCA |
| <i>ispE</i> | fw: gccaaagcttgcacgctgcaCGATTGCGACAAGAATACCG<br>rv: gctatttctagctctaaaacCGGTATTCTTGTGCGAATCG  |
| <i>ispF</i> | fw: gccaaagcttgcacgctgcaGCGGCGGGGTCCAAATTTGG<br>rv: gctatttctagctctaaaacCCAAATTTGGACCCCGCCGC  |
| <i>ispG</i> | fw: gccaaagcttgcacgctgcaGTTGCCTGGGTTACACGAA<br>rv: gctatttctagctctaaaacTTCGTGTGAACCCAGGCAAC   |
| <i>ispH</i> | fw: gccaaagcttgcacgctgcaATTTCTTACGGACATAAAT<br>rv: gctatttctagctctaaaacATTTATGTCCGTAAAGAAAT   |
| <i>ldh</i>  | fw: gccaaagcttgcacgctgcaAGCGGAGTCCAGGACAGTTC<br>rv: gctatttctagctctaaaacGAACTGTCTGGACTCCGCT   |
| <i>malE</i> | fw: gccaaagcttgcacgctgcaAACACCAGGGGTGTAAGCAA<br>rv: gctatttctagctctaaaacTTGCTTACACCCCTGGTGT   |
| <i>mdh</i>  | fw: gccaaagcttgcacgctgcaTCCAGAAGTTTCAGTTCTAC<br>rv: gctatttctagctctaaaacGTAGA ACTGAACTTCTGGA  |
| <i>mmpl</i> | fw: gccaaagcttgcacgctgcaAAGCCAAACTAAAATTAGCA<br>rv: gctatttctagctctaaaacTGCTAATTTTAGTTTGGCTT  |
| <i>odhA</i> | fw: gccaaagcttgcacgctgcaGGCTGTGCTTCTGTTGTAGC<br>rv: gctatttctagctctaaaacGCTACAACAGAAGCACAGCC  |
| <i>odx</i>  | fw: gccaaagcttgcacgctgcaGTGAACTTTGGTTCAGTGAA<br>rv: gctatttctagctctaaaacTTC ACTGAACCAAAGTTCAC |
| <i>opcA</i> | fw: gccaaagcttgcacgctgcaGGTCTTGAAATTTGCTGGG<br>rv: gctatttctagctctaaaacCCCAGCAAATTTCCAAGACC   |
| <i>pck</i>  | fw: gccaaagcttgcacgctgcaTCTTCTGGCCTGGCTCCAA<br>rv: gctatttctagctctaaaacTTGGAGCCAGGCCAGGAAGA   |
| <i>pfkA</i> | fw: gccaaagcttgcacgctgcaCACACGGTTGTGAGATTCAG<br>rv: gctatttctagctctaaaacCTGAATCTCACAACCGTGTG  |
| <i>pgi</i>  | fw: gctatttctagctctaaaacCTGAATCTCACAACCGTGTG<br>rv: gctatttctagctctaaaacCGTTTCTGTGTTGGAAGACC  |
| <i>pgk</i>  | fw: gccaaagcttgcacgctgcaGGCAATGATTCCGCCCTTAT<br>rv: gctatttctagctctaaaacATAAGGGCCGAATCATTGCC  |
| <i>pgl</i>  | fw: gccaaagcttgcacgctgcaTGGACTCAGAATCACTGACA<br>rv: gctatttctagctctaaaacTGTCAGTGATTCTGAGTCCA  |
| <i>pgm</i>  | fw: gccaaagcttgcacgctgcaGCCATCACGAGGAGGGTTGT<br>rv: gctatttctagctctaaaacACAACCCTCCTCGTGATGGC  |
| <i>ppc</i>  | fw: gccaaagcttgcacgctgcaTGC GCGGCGGAGTCTCAGTT<br>rv: gctatttctagctctaaaacAACTGAGACTCGCCGCCGCA |
| <i>ppsA</i> | fw: gccaaagcttgcacgctgcaCCACCGAGTACTTCTAGAAC<br>rv: gctatttctagctctaaaacGTTCTAGAAGTACTCGGTGG  |

| target       | annealing oligo primer sequence (5' → 3')                                                   |
|--------------|---------------------------------------------------------------------------------------------|
| <i>pqo</i>   | fw: gccaaagcttgcctgcaCAATCTGGGCACTCGGAATA<br>rv: gctatttctagctctaaaacTATTCCGAGTGCCCAGATTG   |
| <i>pta</i>   | fw: gccaaagcttgcctgcaGTCCATCGACGCATAGTTCT<br>rv: gctatttctagctctaaaacAGAACTATGCGTCGATGGAC   |
| <i>ptsG</i>  | fw: gccaaagcttgcctgcaCAATCCACGAGTACTTGCCA<br>rv: gctatttctagctctaaaacTGGCAAGTACTCGTGGATTG   |
| <i>pyc</i>   | fw: gccaaagcttgcctgcaCTTCAGAAGCAAAAGAGCGG<br>rv: gctatttctagctctaaaacCCGCTCTTTTGCTTCTGAAG   |
| <i>pyk</i>   | fw: gccaaagcttgcctgcaCAAGACGGATCTTCGGTCCT<br>rv: gctatttctagctctaaaacAGGACCGAAGATCCGTCTTG   |
| <i>ramB</i>  | fw: gccaaagcttgcctgcaTCGGTGATGCGCAATAACAC<br>rv: gctatttctagctctaaaacGTGTTATTGCGCATCACCGA   |
| <i>rpe</i>   | fw: gccaaagcttgcctgcaCCAACACCTGCTCCCCTAAG<br>rv: gctatttctagctctaaaacCTTAGGGGAGCAGGTGTTGG   |
| <i>rpi</i>   | fw: gccaaagcttgcctgcaCTTCGTGGCCGTGGGCCTTA<br>rv: gctatttctagctctaaaacTAAGGCCACGGCCACGAAG    |
| <i>rsdA</i>  | fw: gccaaagcttgcctgcaGGTTGTCAGTGTCTGTACCT<br>rv: gctatttctagctctaaaacAGGTACAGACAGTGACAACC   |
| <i>rshA</i>  | fw: gccaaagcttgcctgcaAATCCGCAGACGCTCGCAGG<br>rv: gctatttctagctctaaaacCCTGCGAGCGTCTGCGGATT   |
| <i>sdhA</i>  | fw: gccaaagcttgcctgcaGTTCTTAGGGGACCAGATG<br>rv: gctatttctagctctaaaacCATCTGGTCCCCTAAGGAAC    |
| <i>sdhB</i>  | fw: gccaaagcttgcctgcaACGTGGAGGGTATCAGCGTC<br>rv: gctatttctagctctaaaacGACGCTGATACCCTCCACGT   |
| <i>sdhCD</i> | fw: gccaaagcttgcctgcaCGACCAGCAGGATAAATACGT<br>rv: gctatttctagctctaaaacACGTATTATCCTGCTGGTCCG |
| <i>sigA</i>  | fw: gccaaagcttgcctgcaGACTCAGATGCGACTCCCAA<br>rv: gctatttctagctctaaaacTTGGGAGTCGCATCTGAGTC   |
| <i>sigB</i>  | fw: gccaaagcttgcctgcaTCATGACTTCACGCTCTATC<br>rv: gctatttctagctctaaaacGATAGAGCGTGAAGTCATGA   |
| <i>sigC</i>  | fw: gccaaagcttgcctgcaCCGGGCTAGCGATAGTAGCC<br>rv: gctatttctagctctaaaacGGCTACTATCGCTAGCCCGG   |
| <i>sigD</i>  | fw: gccaaagcttgcctgcaGCGAGCATAACGCAAAACAA<br>rv: gctatttctagctctaaaacTTGTTTTGCGTTATGCTCGC   |
| <i>sigE</i>  | fw: gccaaagcttgcctgcaAGACACGCATGAATGTTTCT<br>rv: gctatttctagctctaaaacAGAAACATTCATGCGTGTCT   |
| <i>sigH</i>  | fw: gccaaagcttgcctgcaCTTTCGGTACATGTTGATGT<br>rv: gctatttctagctctaaaacACATCAACATGTACCGAAAG   |
| <i>sigM</i>  | fw: gccaaagcttgcctgcaGAGCTGCTTCTGCTCTATAA<br>rv: gctatttctagctctaaaacTTATAGAGCAGAAGCAGCTC   |
| <i>sucC</i>  | fw: gccaaagcttgcctgcaGAGCCGACGTCGGTGCCACA<br>rv: gctatttctagctctaaaacTGTGGCACCGACGTCGGCTC   |
| <i>sucD</i>  | fw: gccaaagcttgcctgcaTCGCCGGGAGTAATAATGCC<br>rv: gctatttctagctctaaaacGGCATTATTACTCCCGGCGA   |
| <i>sugR</i>  | fw: gccaaagcttgcctgcaTTGGCCAGATTAAGTGCGAT<br>rv: gctatttctagctctaaaacATCGCACTTAATCTGGCCAA   |
| <i>tal</i>   | fw: gccaaagcttgcctgcaTGCCGGAAGTAATGCGCTCG<br>rv: gctatttctagctctaaaacCGAGCGCATTACTTCGGCA    |

---

| <b>target</b> | <b>annealing oligo primer sequence (5' → 3')</b>                                          |
|---------------|-------------------------------------------------------------------------------------------|
| <i>thiE</i>   | fw: gccaaagcttgcctgcaCGGGAGTCCTTCGCGCATTA<br>rv: gctatttctagctctaaaacTAATGCGCGAAGGACTCCCG |
| <i>tkt</i>    | fw: gccaaagcttgcctgcaTCTCATCTGCATCCCATGTT<br>rv: gctatttctagctctaaaacAACATGGGATGCAGATGAGA |
| <i>tpi</i>    | fw: gccaaagcttgcctgcaGCCCTCAACGAGAGTCTGGA<br>rv: gctatttctagctctaaaacTCCAGACTCTCGTTGAGGGC |
| <i>zwf</i>    | fw: gccaaagcttgcctgcaGCGGTTTGCTAGATCATAAA<br>rv: gctatttctagctctaaaacTTTATGATCTAGCAAACCGC |

---

**Table S3:** Data generated with the CRISPRi library for all targets.  $\Delta$ OD, growth rate and decaprenoxanthin production are listed. Mean values of two biological duplicates are given.

| <b>target</b> | <b><math>\Delta</math>OD<sub>600</sub></b> | <b>growth rate [h<sup>-1</sup>]</b> | <b>decaprenoxanthin [mg (g CDW)<sup>-1</sup>]</b> |
|---------------|--------------------------------------------|-------------------------------------|---------------------------------------------------|
| <i>aceA</i>   | 43.6 ± 2.0                                 | 0.33 ± 0.00                         | 0.09 ± 0.00                                       |
| <i>aceB</i>   | 39.6 ± 4.2                                 | 0.34 ± 0.02                         | 0.08 ± 0.01                                       |
| <i>aceE</i>   | 30.9 ± 1.1                                 | 0.18 ± 0.02                         | 0.11 ± 0.01                                       |
| <i>ackA</i>   | 45.9 ± 0.3                                 | 0.30 ± 0.01                         | 0.08 ± 0.00                                       |
| <i>acn</i>    | 48.1 ± 1.3                                 | 0.16 ± 0.00                         | 0.05 ± 0.00                                       |
| <i>crtB</i>   | 45.3 ± 0.9                                 | 0.34 ± 0.00                         | 0.01 ± 0.00                                       |
| <i>crtE</i>   | 40.5 ± 1.7                                 | 0.32 ± 0.01                         | 0.02 ± 0.00                                       |
| <i>crtEb</i>  | 47.5 ± 0.3                                 | 0.32 ± 0.00                         | 0.01 ± 0.00                                       |
| <i>crtI</i>   | 46.0 ± 0.8                                 | 0.30 ± 0.00                         | 0.00 ± 0.00                                       |
| <i>crtR</i>   | 43.0 ± 5.6                                 | 0.17 ± 0.01                         | 0.44 ± 0.05                                       |
| <i>crtX</i>   | 38.0 ± 2.4                                 | 0.30 ± 0.01                         | 0.07 ± 0.00                                       |
| <i>crtYe</i>  | 34.9 ± 5.9                                 | 0.32 ± 0.01                         | 0.02 ± 0.00                                       |
| <i>deoC</i>   | 38.7 ± 1.7                                 | 0.27 ± 0.03                         | 0.03 ± 0.00                                       |
| <i>dxr</i>    | 41.0 ± 0.2                                 | 0.25 ± 0.02                         | 0.04 ± 0.00                                       |
| <i>dxs</i>    | 40.2 ± 2.6                                 | 0.31 ± 0.01                         | 0.02 ± 0.01                                       |
| <i>eno</i>    | 45.8 ± 0.6                                 | 0.20 ± 0.00                         | 0.06 ± 0.00                                       |
| <i>fba</i>    | 42.6 ± 1.6                                 | 0.25 ± 0.01                         | 0.04 ± 0.00                                       |
| <i>fbp</i>    | 58.4 ± 3.4                                 | 0.30 ± 0.00                         | 0.05 ± 0.00                                       |
| <i>fixB</i>   | 30.5 ± 1.5                                 | 0.14 ± 0.00                         | 0.02 ± 0.00                                       |
| <i>fum</i>    | 41.7 ± 3.3                                 | 0.33 ± 0.01                         | 0.07 ± 0.01                                       |
| <i>gapA</i>   | 36.4 ± 1.0                                 | 0.24 ± 0.01                         | 0.07 ± 0.00                                       |
| <i>gltA</i>   | 56.1 ± 1.5                                 | 0.28 ± 0.01                         | 0.05 ± 0.00                                       |
| <i>glxR</i>   | 41.9 ± 3.7                                 | 0.33 ± 0.00                         | 0.15 ± 0.01                                       |
| <i>gnd</i>    | 38.4 ± 0.6                                 | 0.20 ± 0.01                         | 0.04 ± 0.00                                       |
| <i>icd</i>    | 44.7 ± 0.7                                 | 0.23 ± 0.00                         | 0.05 ± 0.01                                       |
| <i>idsA</i>   | 44.5 ± 0.9                                 | 0.30 ± 0.01                         | 0.06 ± 0.01                                       |
| <i>IldD</i>   | 58.5 ± 3.1                                 | 0.33 ± 0.01                         | 0.05 ± 0.00                                       |
| <i>ispE</i>   | 43.1 ± 3.5                                 | 0.34 ± 0.01                         | 0.06 ± 0.01                                       |
| <i>ispF</i>   | 45.5 ± 3.3                                 | 0.31 ± 0.00                         | 0.07 ± 0.01                                       |
| <i>ispG</i>   | 43.7 ± 3.5                                 | 0.35 ± 0.00                         | 0.01 ± 0.00                                       |
| <i>ispH</i>   | 33.4 ± 5.2                                 | 0.17 ± 0.02                         | 0.03 ± 0.00                                       |
| <i>ldh</i>    | 36.3 ± 3.1                                 | 0.29 ± 0.01                         | 0.06 ± 0.01                                       |
| <i>malE</i>   | 39.3 ± 0.3                                 | 0.25 ± 0.01                         | 0.08 ± 0.00                                       |
| <i>mdh</i>    | 43.5 ± 1.1                                 | 0.34 ± 0.00                         | 0.06 ± 0.00                                       |
| <i>mmpl</i>   | 43.2 ± 1.8                                 | 0.32 ± 0.01                         | 0.01 ± 0.00                                       |
| <i>odhA</i>   | 44.4 ± 1.6                                 | 0.24 ± 0.01                         | 0.08 ± 0.02                                       |
| <i>odx</i>    | 57.9 ± 0.1                                 | 0.29 ± 0.00                         | 0.05 ± 0.00                                       |
| <i>opcA</i>   | 43.6 ± 1.2                                 | 0.29 ± 0.01                         | 0.04 ± 0.01                                       |
| <i>pck</i>    | 55.1 ± 1.5                                 | 0.31 ± 0.02                         | 0.06 ± 0.00                                       |
| <i>pfkA</i>   | 57.6 ± 0.2                                 | 0.21 ± 0.00                         | 0.06 ± 0.00                                       |
| <i>pgi</i>    | 55.1 ± 3.7                                 | 0.28 ± 0.01                         | 0.10 ± 0.00                                       |
| <i>pgk</i>    | 37.8 ± 0.4                                 | 0.26 ± 0.01                         | 0.06 ± 0.00                                       |
| <i>pgl</i>    | 39.6 ± 0.4                                 | 0.20 ± 0.01                         | 0.02 ± 0.00                                       |
| <i>pgm</i>    | 55.3 ± 4.5                                 | 0.31 ± 0.00                         | 0.05 ± 0.01                                       |
| <i>ppc</i>    | 46.0 ± 1.2                                 | 0.27 ± 0.01                         | 0.04 ± 0.00                                       |
| <i>ppsA</i>   | 55.7 ± 0.3                                 | 0.31 ± 0.01                         | 0.05 ± 0.00                                       |
| <i>pqo</i>    | 55.8 ± 2.6                                 | 0.31 ± 0.01                         | 0.06 ± 0.00                                       |

| <b>target</b> | <b><math>\Delta OD_{600}</math></b> | <b>growth rate [h<sup>-1</sup>]</b> | <b>decaprenoxanthin [mg (g CDW)<sup>-1</sup>]</b> |
|---------------|-------------------------------------|-------------------------------------|---------------------------------------------------|
| <i>pta</i>    | 45.5 ± 0.7                          | 0.30 ± 0.00                         | 0.08 ± 0.00                                       |
| <i>ptsG</i>   | 52.9 ± 1.1                          | 0.21 ± 0.00                         | 0.06 ± 0.00                                       |
| <i>pyc</i>    | 54.8 ± 2.4                          | 0.31 ± 0.00                         | 0.06 ± 0.01                                       |
| <i>pyk</i>    | 52.8 ± 1.6                          | 0.38 ± 0.01                         | 0.05 ± 0.01                                       |
| <i>ramB</i>   | 27.5 ± 0.1                          | 0.19 ± 0.04                         | 0.07 ± 0.04                                       |
| <i>rpe</i>    | 45.6 ± 1.2                          | 0.27 ± 0.00                         | 0.07 ± 0.02                                       |
| <i>rpi</i>    | 30.2 ± 0.8                          | 0.26 ± 0.06                         | 0.04 ± 0.02                                       |
| <i>rsdA</i>   | 38.8 ± 0.4                          | 0.30 ± 0.00                         | 0.07 ± 0.00                                       |
| <i>rshA</i>   | 46.2 ± 1.0                          | 0.31 ± 0.00                         | 0.04 ± 0.01                                       |
| <i>sdhA</i>   | 45.0 ± 1.0                          | 0.34 ± 0.01                         | 0.04 ± 0.00                                       |
| <i>sdhB</i>   | 45.9 ± 2.5                          | 0.32 ± 0.00                         | 0.04 ± 0.00                                       |
| <i>sdhCD</i>  | 52.8 ± 3.2                          | 0.32 ± 0.01                         | 0.03 ± 0.00                                       |
| <i>sigA</i>   | 8.5 ± 2.7                           | 0.06 ± 0.01                         | 0.08 ± 0.01                                       |
| <i>sigB</i>   | 44.1 ± 0.3                          | 0.28 ± 0.01                         | 0.09 ± 0.00                                       |
| <i>sigC</i>   | 45.3 ± 1.7                          | 0.31 ± 0.00                         | 0.06 ± 0.00                                       |
| <i>sigD</i>   | 35.5 ± 4.3                          | 0.32 ± 0.01                         | 0.08 ± 0.01                                       |
| <i>sigE</i>   | 42.9 ± 0.1                          | 0.31 ± 0.01                         | 0.06 ± 0.00                                       |
| <i>sigH</i>   | 44.1 ± 0.9                          | 0.31 ± 0.00                         | 0.06 ± 0.00                                       |
| <i>sigM</i>   | 41.7 ± 0.7                          | 0.32 ± 0.02                         | 0.06 ± 0.00                                       |
| <i>sucC</i>   | 46.5 ± 0.3                          | 0.31 ± 0.01                         | 0.07 ± 0.00                                       |
| <i>sucD</i>   | 47.9 ± 0.5                          | 0.34 ± 0.01                         | 0.07 ± 0.00                                       |
| <i>sugR</i>   | 28.3 ± 3.9                          | 0.15 ± 0.00                         | 0.03 ± 0.01                                       |
| <i>tal</i>    | 36.6 ± 0.6                          | 0.24 ± 0.05                         | 0.02 ± 0.00                                       |
| <i>thiE</i>   | 35.4 ± 4.0                          | 0.19 ± 0.01                         | 0.06 ± 0.01                                       |
| <i>tkt</i>    | 37.2 ± 2.4                          | 0.19 ± 0.00                         | 0.02 ± 0.00                                       |
| <i>tpi</i>    | 40.5 ± 1.1                          | 0.32 ± 0.00                         | 0.07 ± 0.00                                       |
| <i>zwf</i>    | 38.1 ± 0.7                          | 0.19 ± 0.00                         | 0.02 ± 0.00                                       |
